# Supplementary figures and images for: Cardiovascular disease and subsequent risk of psychiatric disorders: a nationwide sibling-controlled study
Source: eLife journal article supplement (doi:10.7554/elife.80143), 2022-10-21

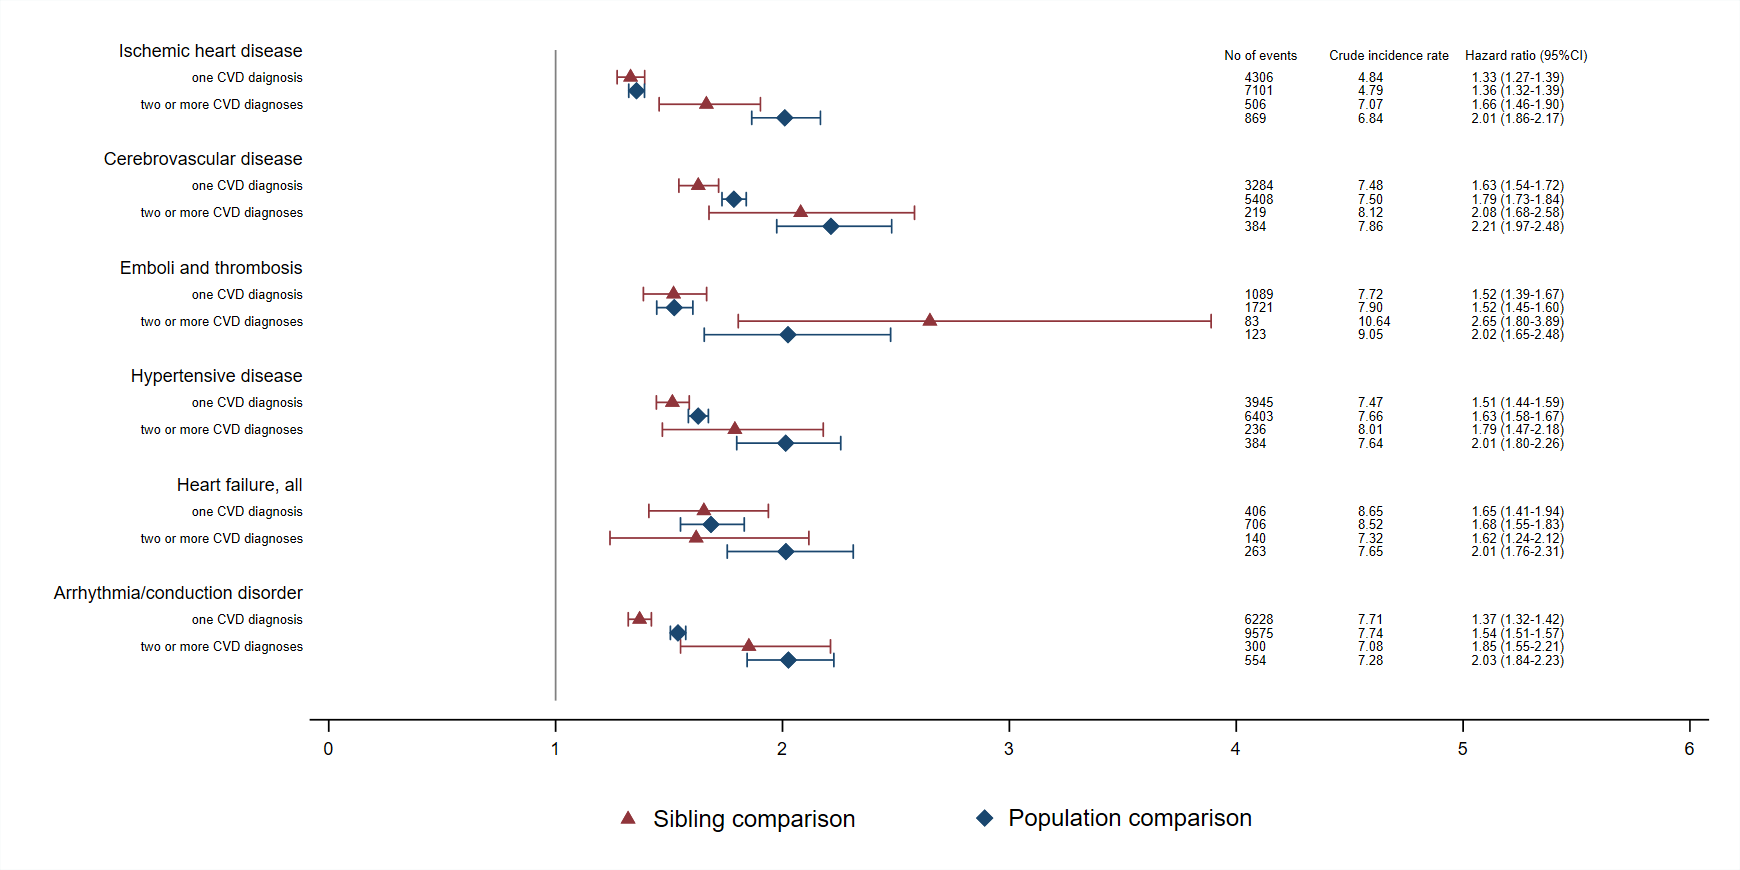

Supplement: supp [file elife_poa_e80143_Figure_3_figure_supplement_1.docx]

1) six months of follow-upa


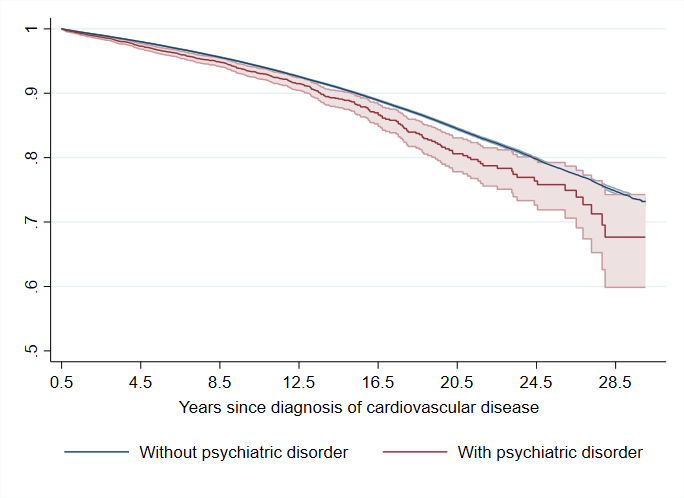


2) two years of follow-upb


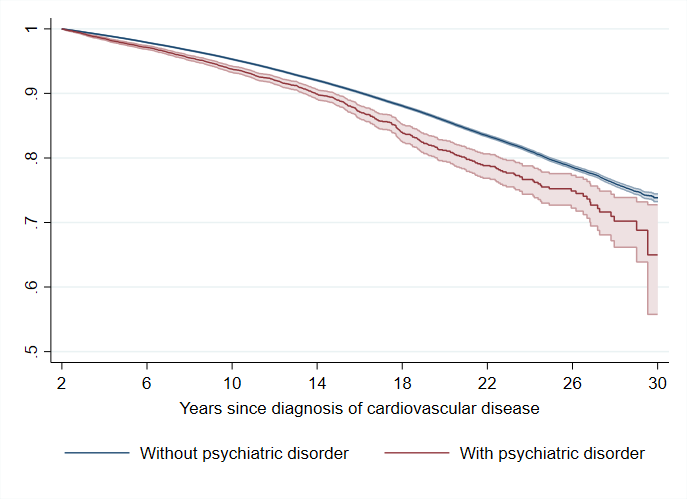

Supplement: supp [file elife_poa_e80143_Figure_4_figure_supplement_1.docx]

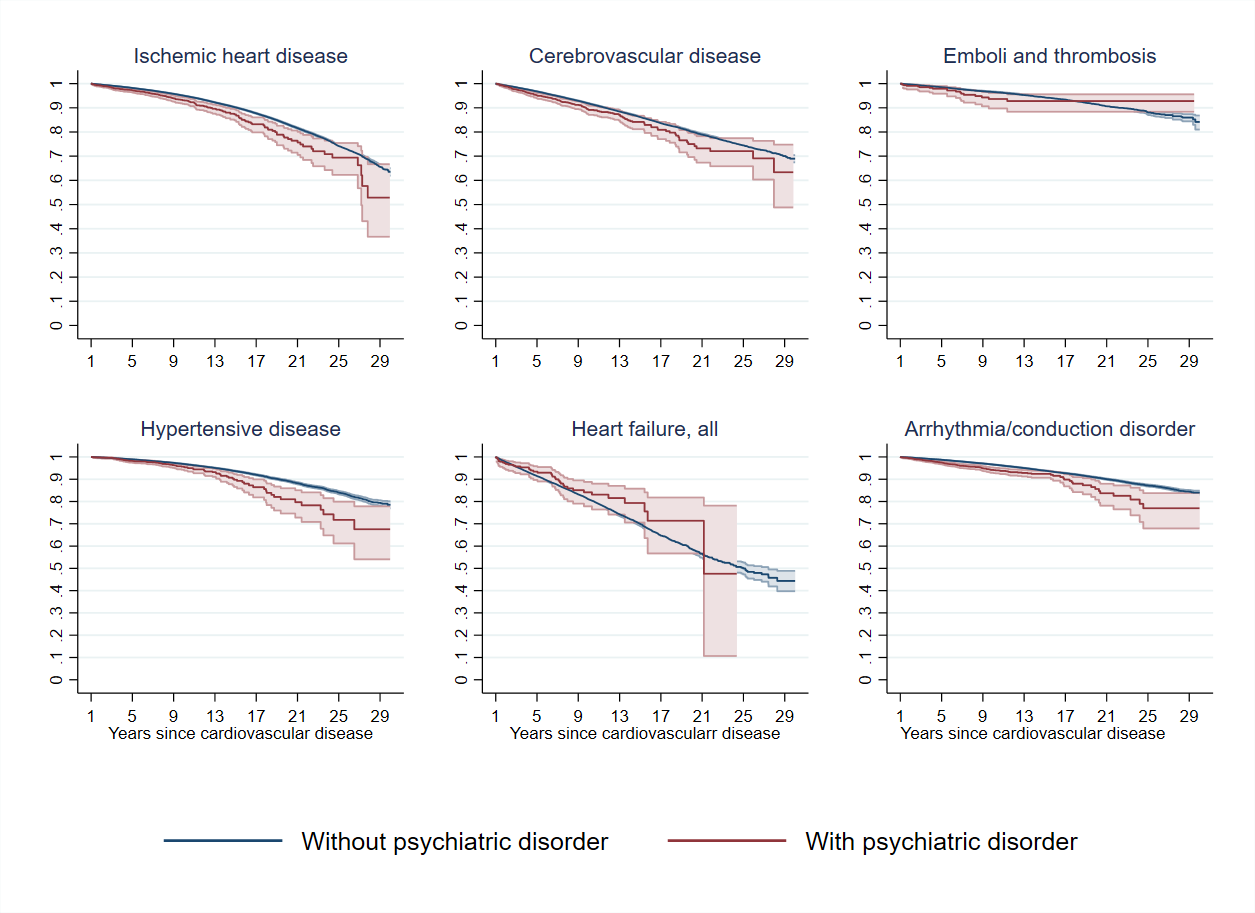

Supplement: supp [file elife_poa_e80143_Figure_4_figure_supplement_2.docx]

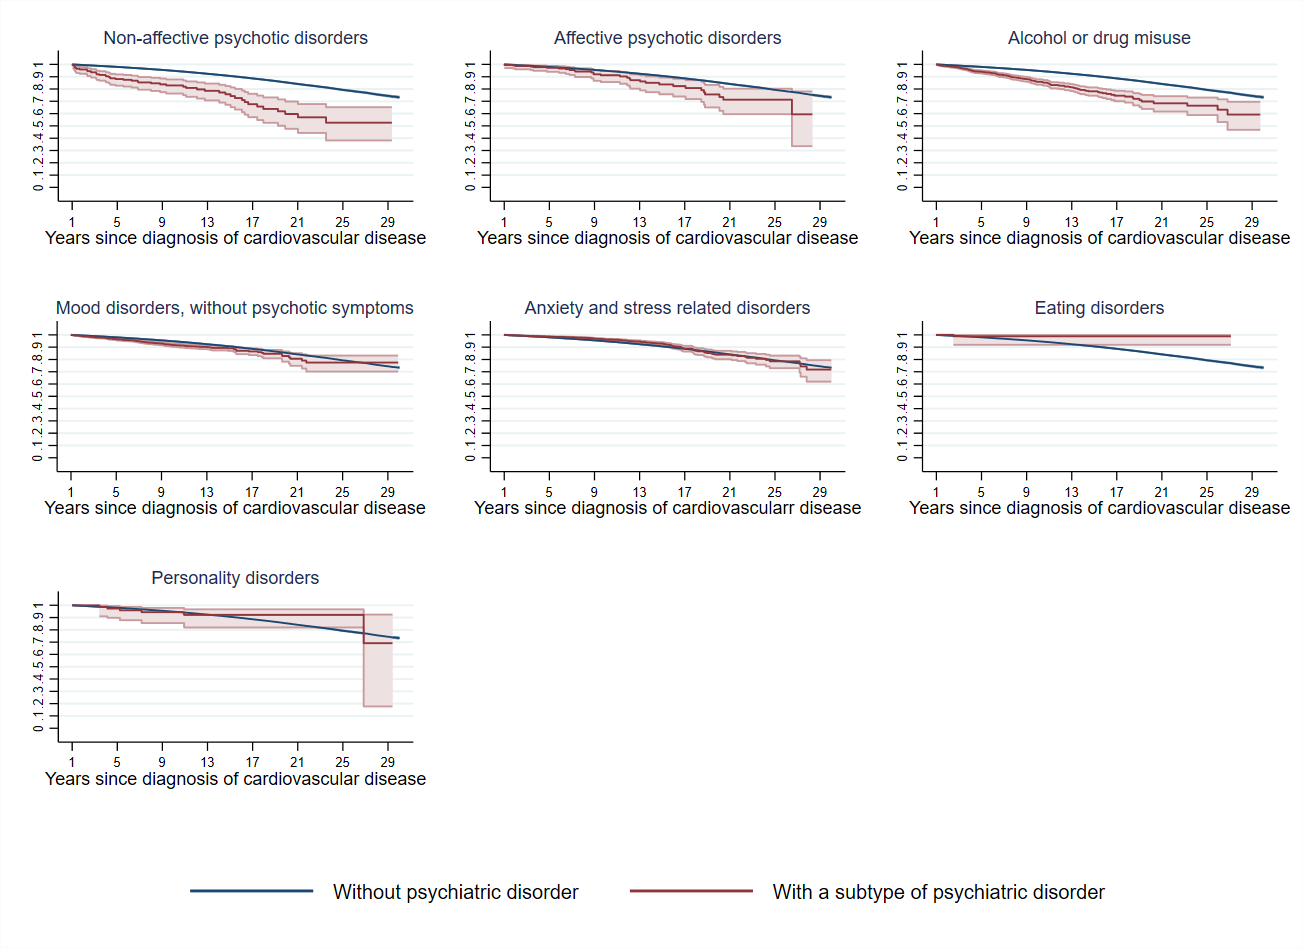

Supplement: supp [file elife_poa_e80143_Figure_4_figure_supplement_3.docx]
